# Supplementary material for: Memristors based on 2D MoSe2 nanosheets as artificial synapses and nociceptors for neuromorphic computing
Source: Royal Society of Chemistry journal article supplement (doi:10.1039/d3nr01301d), 2023-01-01
Supplement: d3nr01301d1.pdf [file d3nr01301d1.pdf]

Electronic Supplementary Material (ESI) for Nanoscale.

This journal is © The Royal Society of Chemistry 2023

## **Memristor based on 2D MoSe<sub>2</sub> nanosheets as artificial synapse and nociceptor for neuromorphic computing**

Huan Duan,<sup>a</sup> Dehui Wang,<sup>a</sup> Jingxi Gou,<sup>a</sup> Feng Guo,<sup>b,c</sup> Wenjing Jie<sup>\*a</sup> and Jianhua Hao<sup>\*b,c</sup>

<sup>a</sup>*College of Chemistry and Materials Science, Sichuan Normal University, Chengdu, 610066, China.*

<sup>b</sup>*Department of Applied Physics, The Hong Kong Polytechnic University, Hong Kong, 999077, China.*

<sup>c</sup>*The Hong Kong Polytechnic University Shenzhen Research Institute, Shenzhen, 518057, China.*

**Corresponding Author**

\*E-mail: [wenjing.jie@sicnu.edu.cn](mailto:wenjing.jie@sicnu.edu.cn), [jh.hao@polyu.edu.hk](mailto:jh.hao@polyu.edu.hk).

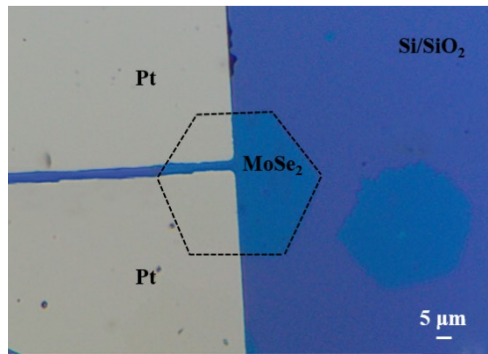

**Fig. S1.** The optical microscope image of the memristor with Pt/MoSe<sub>2</sub>/Pt structure on SiO<sub>2</sub>/Si substrate.

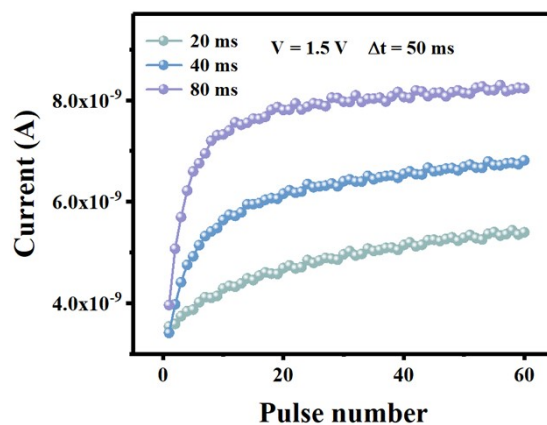

**Fig. S2.** The pulse width dependent potentiation behaviors with pulse amplitude of 1.5 V, pulse interval of 50 ms and the pulse width ranging from 20 to 80 ms. As the pulse width increases from 20 to 80 ms, the potentiation effects are enhanced in the long-term potentiation (LTP) behaviors.

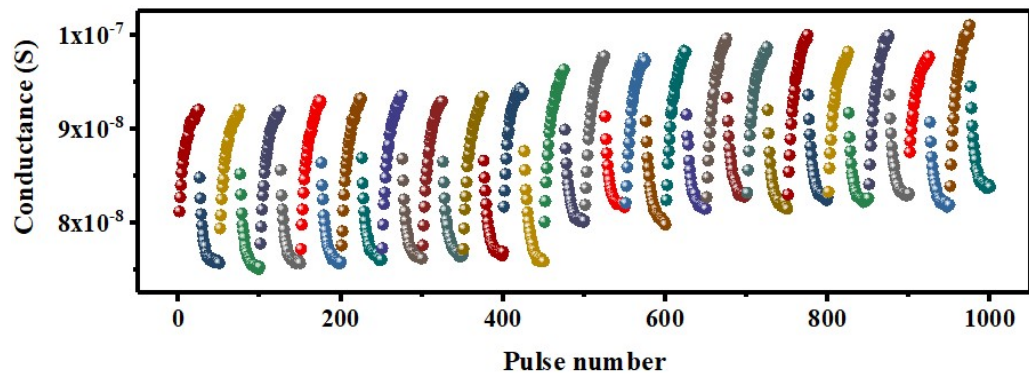

**Fig. S3.** The consecutive 20 sets of LTP/LTD cycles with good repeatability.

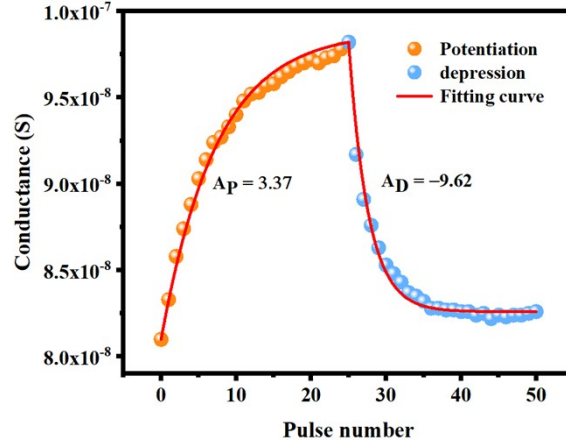

**Fig. S4.** Fitting curve of the typical LTP and LTD curves.

To describe the linearity of LTP and long-term depression (LTD) quantitatively, the relationship between the conductance value ( $G$ ) and the number of pulses ( $x$ ) was fitted by the following two equations:<sup>1</sup>

$$G_{LTP}(x) = \frac{G_{max} - G_{min}}{1 - \exp\left(\frac{-A_P}{P_{max}} \cdot x\right)} \left[ 1 - \exp\left(\frac{-A_P}{P_{max}} \cdot x\right) \right] + G_{min} \quad (1)$$

$$G_{LTP}(x) = \frac{G_{max} - G_{min}}{1 - \exp\left(\frac{-A_D}{P_{max}} \cdot (2P_{max} - x)\right)} \left[ 1 - \exp\left(\frac{-A_D}{P_{max}} \cdot (2P_{max} - x)\right) \right] + G_{min} \quad (2)$$

where  $G_{max}$  refers to the maximum conductance value,  $G_{min}$  refers to the minimum conductance value,  $P_{max}$  is the maximum number of pulses, and  $A_P$  and  $A_D$  are the number of nonlinear factors of LTP and LTD, respectively. The fitted curves are shown in Fig. S4, where  $A_P$  is about 3.37 and  $A_D$  is about  $-9.62$ . Although the nonlinear factors for LTP and LTD are relatively large, the simulation of image recognition based on the artificial neural network (ANN) can be achieved with the recognition accuracy of small image up to 92% and large image up to 85%.

## References

- 1 S. Cheng, L. Zhong, J. Yin, H. Duan, Q. Xie, W. Luo and W. Jie, *Nanoscale*, 2023, **15**, 4801–4808.
